# Supplementary material
Source: PubMed Central journal article supplement (PMC8867922)
Supplement: NIHMS1766249-supplement-supplement.pdf [file NIHMS1766249-supplement-supplement.pdf]

**Appendix**  
**Parental Vaccine Hesitancy and Association With Childhood Diphtheria, Tetanus Toxoid, and Acellular Pertussis; Measles, Mumps and Rubella; Rotavirus; and Combined 7-Series Vaccination**  
**Nguyen et al.**

**Appendix Table 1.** Vaccine Hesitancy Questions, April–June Interviews, 2018 And 2019, National Immunization Survey-Child

| Vaccine hesitancy questions                                                                                                                                                                                                                                                                                                                                                                              | Response                                                                                                                                                                                            | Notes                                                                                                                                                    |
|----------------------------------------------------------------------------------------------------------------------------------------------------------------------------------------------------------------------------------------------------------------------------------------------------------------------------------------------------------------------------------------------------------|-----------------------------------------------------------------------------------------------------------------------------------------------------------------------------------------------------|----------------------------------------------------------------------------------------------------------------------------------------------------------|
| <b>Preamble:</b> The next set of questions are about all recommended childhood vaccines, not just flu vaccination.                                                                                                                                                                                                                                                                                       |                                                                                                                                                                                                     |                                                                                                                                                          |
| <p>1. <i>Is the child administered vaccines following a standard schedule, or some other schedule, such as the Sears Schedule?</i></p> <p>Read if necessary: The standard schedule is the vaccination schedule recommended by CDC and by the American Academy of Pediatrics (AAP). “Some other schedule” refers to an alternative schedule that deviates from the CDC- and AAP-recommended schedule.</p> | <ul style="list-style-type: none"> <li>• Standard schedule</li> <li>• Some other schedule</li> <li>• Don’t know</li> <li>• Refused</li> </ul>                                                       | <ul style="list-style-type: none"> <li>• Coded as 1 for some other schedule and 0 for standard schedule</li> </ul>                                       |
| <p>2. <i>Overall, how hesitant about childhood shots would you consider yourself to be?</i></p>                                                                                                                                                                                                                                                                                                          | <ul style="list-style-type: none"> <li>• Not at all hesitant</li> <li>• Not that hesitant</li> <li>• Somewhat hesitant</li> <li>• Very hesitant</li> <li>• Don’t know</li> <li>• Refused</li> </ul> | <ul style="list-style-type: none"> <li>• Coded as 1 for somewhat hesitant or very hesitant and 0 or not at all hesitant and not that hesitant</li> </ul> |
| <p>3. <i>Did concerns about the number of vaccines the child gets at one time impact your decision to get the child vaccinated?</i></p>                                                                                                                                                                                                                                                                  | <ul style="list-style-type: none"> <li>• Yes</li> <li>• No</li> <li>• Don’t know</li> <li>• Refused</li> </ul>                                                                                      | <ul style="list-style-type: none"> <li>• Coded as 1 for yes and 0 for no</li> </ul>                                                                      |
| <p>4. <i>Did concerns about serious, long-term side effects impact your decision to get the child vaccinated?</i></p>                                                                                                                                                                                                                                                                                    | <ul style="list-style-type: none"> <li>• Yes</li> <li>• No</li> <li>• Don’t know</li> <li>• Refused</li> </ul>                                                                                      | <ul style="list-style-type: none"> <li>• Coded as 1 for yes and 0 for no</li> </ul>                                                                      |
| <p>5. <i>Do you personally know anyone who has had a serious, long-term side effect from a vaccine?</i></p>                                                                                                                                                                                                                                                                                              | <ul style="list-style-type: none"> <li>• Yes</li> <li>• No</li> <li>• Don’t know</li> <li>• Refused</li> </ul>                                                                                      | <ul style="list-style-type: none"> <li>• Coded as 1 for yes and 0 for no</li> </ul>                                                                      |
| <p>6. <i>Is the child’s doctor or health provider your most trusted source of information about childhood vaccines?</i></p>                                                                                                                                                                                                                                                                              | <ul style="list-style-type: none"> <li>• Yes</li> <li>• No</li> <li>• Don’t know</li> <li>• Refused</li> </ul>                                                                                      | <ul style="list-style-type: none"> <li>• Coded as 1 for yes and 0 for no</li> </ul>                                                                      |

**Appendix**  
**Parental Vaccine Hesitancy and Association With Childhood Diphtheria, Tetanus Toxoid, and Acellular Pertussis; Measles, Mumps and Rubella; Rotavirus; and Combined 7-Series Vaccination**  
**Nguyen et al.**

**Appendix Table 2.** Parental Vaccine Hesitancy and Vaccination Schedule Adherence by Perceptions, April–June, 2018 and 2019, NIS-Child

| <b>Perceptions</b>                                                            | <b>Hesitant about childhood vaccinations<br/>% (95%CI)</b> | <b>Follow some other schedule<br/>% (95%CI)</b> |
|-------------------------------------------------------------------------------|------------------------------------------------------------|-------------------------------------------------|
| Concerned about the number of vaccines received at one time                   |                                                            |                                                 |
| Yes                                                                           | <b>60.3 (54.1, 66.1)</b>                                   | <b>13.7 (10.8, 17.1)</b>                        |
| No (ref)                                                                      | 11.9 (10.4, 13.7)                                          | 2.7 (2.1, 3.3)                                  |
| Concerned about serious, long-term side effects                               |                                                            |                                                 |
| Yes                                                                           | <b>62.9 (57.7, 67.7)</b>                                   | <b>12.6 (10.0, 15.7)</b>                        |
| No (ref)                                                                      | 11.6 (9.1, 14.7)                                           | 3.2 (2.5, 3.9)                                  |
| Personally know someone with serious, long-term side effect from a vaccine    |                                                            |                                                 |
| Yes                                                                           | <b>52.5 (44.2, 60.6)</b>                                   | <b>15.0 (11.1, 20.0)</b>                        |
| No (ref)                                                                      | 20.0 (17.3, 23.0)                                          | 4.2 (3.5, 5.1)                                  |
| Doctor is not the most trusted source of information about childhood vaccines |                                                            |                                                 |
| Yes                                                                           | <b>39.2 (32.9, 46.0)</b>                                   | <b>14.4 (10.8, 18.9)</b>                        |
| No (ref)                                                                      | 21.2 (18.4, 24.3)                                          | 4.0 (3.3, 4.8)                                  |

*Note:* Boldface indicates statistical significance ( $p < 0.05$ ) using  $t$ -test comparing each response level to the reference group.

NIS, National Immunization Survey.

**Appendix**  
**Parental Vaccine Hesitancy and Association With Childhood Diphtheria, Tetanus Toxoid, and Acellular Pertussis; Measles, Mumps and Rubella; Rotavirus; and Combined 7-Series Vaccination**  
**Nguyen et al.**

**Appendix Figure 1.** Vaccination coverage by parental vaccine hesitancy, April–June, 2018 and 2019, NIS-Child.

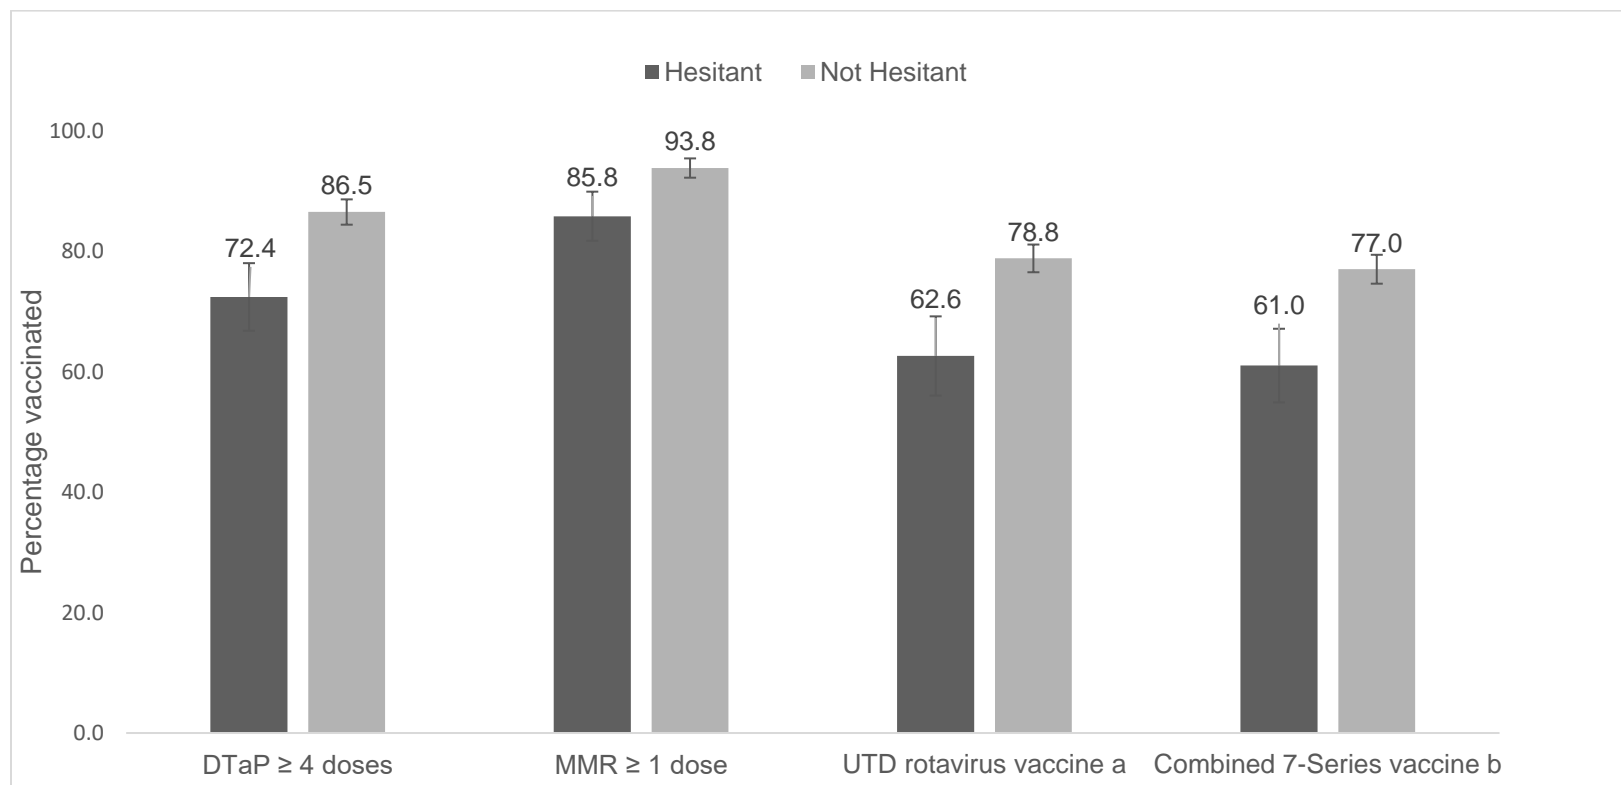

*Note:* Differences in childhood vaccinations between hesitant and non-hesitant parents were all statistically significant ( $p < 0.05$ ).

<sup>a</sup>Up to date defined as  $\geq 3$  rotavirus doses of any type or  $\geq 2$  Rotarix® doses.

<sup>b</sup>The combined 7-vaccine series (4:3:1:3\*:3:1:4) includes  $\geq 4$  doses of DTaP,  $\geq 3$  doses of poliovirus vaccine,  $\geq 1$  dose of MMR vaccine, the full series of Hib ( $\geq 3$  or  $\geq 4$  doses, depending on product type),  $\geq 3$  doses of HepB,  $\geq 1$  dose of VAR, and  $\geq 4$  doses of PCV.

UTD, up to date; DTaP, diphtheria and tetanus toxoids and acellular pertussis vaccine; HepB, hepatitis B vaccine; IPV, inactivated polio vaccine; MMR, measles, mumps, and rubella vaccine; PCV, pneumococcal conjugate vaccine; RV, rotavirus vaccine; VAR, varicella vaccine; NIS, National Immunization Survey.
